# Supplementary material for: Integrative taxonomy by molecular species delimitation: multi-locus data corroborate a new species of Balkan Drusinae micro-endemics
Source: Springer Nature journal article supplement (doi:10.1186/s12862-017-0972-5), 2017-06-06
Supplement: MOESM1 [file 12862_2017_972_MOESM1_ESM.pdf]

| Access ID   | Sample ID    | Identification                   | Collection information                                                                                                             | Lat     | Lon     | mtCOI-5P | mtCOI-3P | mt16S   | nuCADH   | nuWnt1  | nu28S     | Storing Institution                               |
|-------------|--------------|----------------------------------|------------------------------------------------------------------------------------------------------------------------------------|---------|---------|----------|----------|---------|----------|---------|-----------|---------------------------------------------------|
| SPDRU124-14 | DBal003      | <i>Drusus balcanicus</i>         | Bulgaria, Plovdiv, Kamare, Hristo Danovo; leg. Balint, Neu; 12-Jun-2008                                                            | 42,7734 | 24,6186 | 658[0n]  | 541[0n]  | 362[0n] | 846[1n]  | 346[0n] | 1038[0n]  | Senckenberg Forschungsinstitut und Naturmuseum    |
| SPDRU125-14 | DBal004      | <i>Drusus balcanicus</i>         | Bulgaria, Plovdiv, Kamare, Hristo Danovo; leg. Balint, Neu; 12-Jun-2008                                                            | 42,7734 | 24,6186 | 658[0n]  | 541[0n]  | 362[0n] | 847[1n]  | 346[0n] | 1038[0n]  | Senckenberg Forschungsinstitut und Naturmuseum    |
| SPDRU147-14 | fAns0101L    | <i>Anisogamus waringeri</i>      | France; leg. Graf; 09-Jun-2013                                                                                                     |         |         | 658[0n]  | 541[0n]  | 360[0n] | 848[0n]  | n.a.    | 1038[0n]  | University of Natural Resources and Life Sciences |
| SPDRU199-14 | fDbu0102M    | <i>Drusus bureschi</i>           | Bulgaria, Veliko Tarnovo region, Tvardita, Tvardishki Prohod, Ciuernerna hut, springs; leg. Ujvarosi, Kolcsar & Torok; 14-Jun-2012 | 42,786  | 25,958  | 658[0n]  | 541[0n]  | 362[0n] | 837[11n] | 346[0n] | 1038[0n]  | University of Natural Resources and Life Sciences |
| SPDRU200-14 | fDbu0104M    | <i>Drusus bureschi</i>           | Bulgaria, Veliko Tarnovo region, Tvardita, Tvardishki Prohod, Ciuernerna hut, springs; leg. Ujvarosi, Kolcsar & Torok; 14-Jun-2012 | 42,786  | 25,958  | n.a      | n.a.     | 362[0n] | n.a.     | n.a.    | 1038[0n]  | University of Natural Resources and Life Sciences |
| SPDRU201-14 | fDbu0105M    | <i>Drusus bureschi</i>           | Bulgaria, Veliko Tarnovo region, Tvardita, Tvardishki Prohod, Ciuernerna hut, springs; leg. Ujvarosi, Kolcsar & Torok; 14-Jun-2012 | 42,786  | 25,958  | 658[0n]  | 541[0n]  | 362[0n] | n.a.     | n.a.    | 1038[0n]  | University of Natural Resources and Life Sciences |
| SPDRU202-14 | fDbu0106m    | <i>Drusus bureschi</i>           | Bulgaria, Veliko Tarnovo region, Tvardita, Tvardishki Prohod, Ciuernerna hut, springs; leg. Ujvarosi, Kolcsar & Torok; 14-Jun-2012 | 42,786  | 25,958  | 658[0n]  | 541[0n]  | 362[0n] | 845[3n]  | 346[0n] | 1037[0n]  | University of Natural Resources and Life Sciences |
| SPDRU203-14 | fDbu0109M    | <i>Drusus bureschi</i>           | Bulgaria, Veliko Tarnovo region, Tvardita, Tvardishki Prohod, Ciuernerna hut, springs; leg. Ujvarosi, Kolcsar & Torok; 14-Jun-2012 | 42,786  | 25,958  | n.a.     | n.a.     | 362[0n] | n.a.     | n.a.    | 1038[0n]  | University of Natural Resources and Life Sciences |
| SPDRU231-14 | fDdd0801M    | <i>Drusus discolor</i>           | Montenegro, Brodavac, right tributary of Perucica; leg. A. Previsic; 10-Jul-2013                                                   | 42,6859 | 19,7364 | 658[0n]  | 541[0n]  | 362[0n] | 848[0n]  | 346[0n] | 1038[0n]  | University of Natural Resources and Life Sciences |
| SPDRU232-14 | fDdd0802F    | <i>Drusus discolor</i>           | Montenegro, Brodavac, right tributary of Perucica; leg. A. Previsic; 10-Jul-2013                                                   | 42,6859 | 19,7364 | 658[0n]  | 541[0n]  | 362[0n] | 848[0n]  | 346[0n] | 1038[0n]  | University of Natural Resources and Life Sciences |
| SPDRU235-14 | fDdi0101M    | <i>Drusus discophoroides</i>     | Greece, Central Macedonia, Serres, Vyroneia, Beabies; leg. Gordon Ramel; 02-May-2008                                               | 41,3167 | 23,2333 | 658[0n]  | 541[0n]  | 362[0n] | 840[8n]  | 346[0n] | 1038[0n]  | University of Natural Resources and Life Sciences |
| SPDRU236-14 | fDdi0102M    | <i>Drusus discophoroides</i>     | Greece, Central Macedonia, Serres, Vyroneia, Beabies; leg. Gordon Ramel; 02-May-2008                                               | 41,3167 | 23,2333 | 658[0n]  | 490[0n]  | 362[0n] | 836[12n] | 346[0n] | 999[1n]   | University of Natural Resources and Life Sciences |
| SPDRU243-14 | fDds0110M    | <i>Drusus discophorus</i>        | Macedonia, Jablanica Mt, spring of the stream near Labunisko Lake; leg. Kucinic, Krpac, Cukusic; 29-May-2013                       |         |         | 658[0n]  | 474[0n]  | 360[0n] | 848[0n]  | 346[0n] | 1038[0n]  | University of Natural Resources and Life Sciences |
| SPDRU244-14 | fDds0111M    | <i>Drusus discophorus</i>        | Macedonia, Jablanica Mt, spring of the stream near Labunisko Lake; leg. Kucinic, Krpac, Cukusic; 29-May-2013                       |         |         | 658[0n]  | n.a.     | 360[0n] | 848[0n]  | 346[0n] | 1038[0n]  | University of Natural Resources and Life Sciences |
| SPDRU245-14 | fDds0112F    | <i>Drusus discophorus</i>        | Macedonia, Jablanica Mt, spring of the stream near Labunisko Lake; leg. Kucinic, Krpac, Cukusic; 29-May-2013                       |         |         | 658[0n]  | 541[0n]  | 360[0n] | 848[0n]  | 346[0n] | 1038[0n]  | University of Natural Resources and Life Sciences |
| SPDRU315-14 | fDmy0101M    | <i>Drusus muranyorum</i>         | Greece, Rhodopes, Nea Santa; leg. Balint; 10-Apr-2012                                                                              | 41,128  | 25,887  | 658[0n]  | 541[0n]  | 362[0n] | 848[0n]  | 346[0n] | 1038[0n]  | University of Natural Resources and Life Sciences |
| SPDRU316-14 | fDmy0103M    | <i>Drusus muranyorum</i>         | Greece, Rhodopes, Nea Santa; leg. Balint; 20-Apr-2012                                                                              | 41,128  | 25,887  | 658[0n]  | 0[0n]    | 362[0n] | 848[0n]  | 346[0n] | 1038[0n]  | University of Natural Resources and Life Sciences |
| SPDRU317-14 | fDmy0104M    | <i>Drusus muranyorum</i>         | Greece, Rhodopes, Nea Santa; leg. Balint; 20-Apr-2012                                                                              | 41,128  | 25,887  | 658[0n]  | 541[0n]  | 362[0n] | 848[0n]  | 346[0n] | 1038[0n]  | University of Natural Resources and Life Sciences |
| SPDRU318-14 | fDmy0105M    | <i>Drusus muranyorum</i>         | Greece, Rhodopes, Nea Santa; leg. Balint; 20-Apr-2012                                                                              | 41,128  | 25,887  | n.a.     | n.a.     | 362[0n] | n.a.     | n.a.    | 1038[0n]  | University of Natural Resources and Life Sciences |
| SPDRU324-14 | fDos0102M    | <i>Drusus osogovicus</i>         | Bulgaria, Kjustendil region: Osogovo Mts., Bogoslov, Osogovska hut surroundings; leg. Ujvarosi, Kolcsar & Torok; 11-Jun-2012       | 42,1967 | 22,6231 | 658[0n]  | 541[0n]  | 362[0n] | 810[0n]  | 346[0n] | 1037[1n]  | University of Natural Resources and Life Sciences |
| SPDRU326-14 | fDos0105M    | <i>Drusus osogovicus</i>         | Bulgaria, Kjustendil region: Osogovo Mts., Bogoslov, Osogovska hut surroundings; leg. Ujvarosi, Kolcsar & Torok; 11-Jun-2012       | 42,1967 | 22,6231 | 658[0n]  | 541[0n]  | 362[0n] | 848[0n]  | 346[0n] | 1036[2n]  | University of Natural Resources and Life Sciences |
| SPDRU327-14 | fDos0106M    | <i>Drusus osogovicus</i>         | Bulgaria, Kjustendil region: Osogovo Mts., Bogoslov, Osogovska hut surroundings; leg. Ujvarosi, Kolcsar & Torok; 11-Jun-2012       | 42,1967 | 22,6231 | 658[0n]  | 541[0n]  | 362[0n] | 847[1n]  | 346[0n] | 1035[3n]  | University of Natural Resources and Life Sciences |
| SPDRU328-14 | fDos0108M    | <i>Drusus osogovicus</i>         | Bulgaria, Kjustendil region: Osogovo Mts., Bogoslov, Osogovska hut surroundings; leg. Ujvarosi, Kolcsar & Torok; 11-Jun-2012       | 42,1967 | 22,6231 | 658[0n]  | 541[0n]  | 362[0n] | 848[0n]  | 346[0n] | 1038[0n]  | University of Natural Resources and Life Sciences |
| SPDRU329-14 | fDos0118F    | <i>Drusus osogovicus</i>         | Bulgaria, Kjustendil region: Osogovo Mts., Bogoslov, Osogovska hut surroundings; leg. Ujvarosi, Kolcsar & Torok; 11-Jun-2012       | 42,1967 | 22,6231 | 658[0n]  | 541[0n]  | 362[0n] | 848[0n]  | 346[0n] | 1038[0n]  | University of Natural Resources and Life Sciences |
| SPDRU339-14 | fDpo0101M    | <i>Drusus popovi</i>             | Bulgaria, Montana, Western Central Balkan, Gintsi, Petrohanski Prohod, spring; leg. Ujvarosi, Kolcsar & Torok; 11-Jun-2012         | 43,114  | 23,1123 | 658[0n]  | n.a.     | 362[0n] | n.a.     | n.a.    | 1038[0n]  | University of Natural Resources and Life Sciences |
| SPDRU340-14 | fDpo0102M    | <i>Drusus popovi</i>             | Bulgaria, Montana, Western Central Balkan, Gintsi, Petrohanski Prohod, spring; leg. Ujvarosi, Kolcsar & Torok; 11-Jun-2012         | 43,114  | 23,1123 | 658[0n]  | 541[0n]  | 362[0n] | 848[0n]  | n.a.    | 1037[1n]  | University of Natural Resources and Life Sciences |
| SPDRU342-14 | fDpo0201F    | <i>Drusus zivici</i>             | Serbia, Stara Planina Mts, spring of the Tovarnicka river; leg. Kucinic, Bjelanovic, Zivic; 19-Jun-2013                            |         |         | 658[0n]  | 541[0n]  | 362[0n] | 848[0n]  | 346[0n] | 1037[1n]  | University of Natural Resources and Life Sciences |
| SPDRU343-14 | fDpo0202M    | <i>Drusus zivici</i>             | Serbia, Stara Planina Mts, spring of the Tovarnicka river; leg. Kucinic, Bjelanovic, Zivic; 19-Jun-2013                            |         |         | 658[0n]  | 541[0n]  | 362[0n] | n.a.     | 346[0n] | 1018[20n] | University of Natural Resources and Life Sciences |
| SPDRU344-14 | fDpo0203M    | <i>Drusus zivici</i>             | Serbia, Stara Planina Mts, spring of the Tovarnicka river; leg. Kucinic, Bjelanovic, Zivic; 19-Jun-2013                            |         |         | 658[0n]  | 541[0n]  | 362[0n] | 846[2n]  | 346[0n] | 1038[0n]  | University of Natural Resources and Life Sciences |
| SPDRU345-14 | fDpo0204L    | <i>Drusus zivici</i>             | Serbia, Stara Planina Mts, spring of the Tovarnicka river; leg. Kucinic, Bjelanovic, Zivic; 19-Jun-2013                            |         |         | 658[0n]  | 541[0n]  | 362[0n] | 783[5n]  | 346[0n] | 1038[0n]  | University of Natural Resources and Life Sciences |
| SPDRU346-14 | fDpo0205L    | <i>Drusus zivici</i>             | Serbia, Stara Planina Mts, spring of the Tovarnicka river; leg. Kucinic, Bjelanovic, Zivic; 19-Jun-2013                            |         |         | 658[0n]  | 541[0n]  | 362[0n] | 845[3n]  | 346[0n] | 1038[0n]  | University of Natural Resources and Life Sciences |
| SPDRU347-14 | fDpo0301M    | <i>Drusus zivici</i>             | Serbia, Stara Planina Mts, spring of the Rekicka river; leg. Kucinic, Bjelanovic, Zivic; 19-Jun-2013                               |         |         | 658[0n]  | 541[0n]  | 362[0n] | 846[2n]  | 346[0n] | 1009[0n]  | University of Natural Resources and Life Sciences |
| SPDRU348-14 | fDpo0302M    | <i>Drusus zivici</i>             | Serbia, Stara Planina Mts, spring of the Rekicka river; leg. Kucinic, Bjelanovic, Zivic; 19-Jun-2013                               |         |         | 658[0n]  | 541[0n]  | 362[0n] | n.a.     | 346[0n] | 1038[0n]  | University of Natural Resources and Life Sciences |
| SPDRU349-14 | fDpo0401F    | <i>Drusus zivici</i>             | Serbia, Stara Planina Mts, spring Kluderske vode; leg. Kucinic, Bjelanovic, Zivic; 20-Jun-2013                                     |         |         | 658[0n]  | 541[0n]  | 325[0n] | 848[0n]  | 346[0n] | 1036[2n]  | University of Natural Resources and Life Sciences |
| SPDRU350-14 | fDpo0501F    | <i>Drusus zivici</i>             | Serbia, Stara Planina Mts, spring of the Javorska river; leg. Kucinic, Bjelanovic, Zivic; 20-Jun-2013                              |         |         | 658[0n]  | 541[0n]  | 362[0n] | 631[1n]  | 346[0n] | 1038[0n]  | University of Natural Resources and Life Sciences |
| SPDRU541-15 | fDsp4301M    | <i>Drusus dardanicus</i>         | Kosovo, Llap catchment; leg. Ibrahimii; 11-May-2014                                                                                |         |         | 658[0n]  | 541[0n]  | 362[0n] | 850[0n]  | 345[0n] | n.a.      | University of Natural Resources and Life Sciences |
| SPDRU542-15 | fDsp4302M    | <i>Drusus dardanicus</i>         | Kosovo, Llap catchment; leg. Ibrahimii; 11-May-2014                                                                                |         |         | 658[0n]  | 541[0n]  | 362[0n] | 850[0n]  | 345[0n] | 1000[0n]  | University of Natural Resources and Life Sciences |
| SPDRU031-14 | fEda0201M    | <i>Ecclisopteryx keroveci</i>    | Montenegro, Brodavac, right tributary of Perucica; leg. Milisa;                                                                    | 42,6859 | 19,7364 | 658[0n]  | 541[0n]  | 362[0n] | 842[6n]  | 346[0n] | 1038[0n]  | University of Natural Resources and Life Sciences |
| SPDRU032-14 | fEda0202F    | <i>Ecclisopteryx keroveci</i>    | Montenegro, Brodavac, right tributary of Perucica; leg. Milisa;                                                                    | 42,6859 | 19,7364 | 658[0n]  | 541[0n]  | 362[0n] | 846[2n]  | 346[0n] | 1038[0n]  | University of Natural Resources and Life Sciences |
| SPDRU003-14 | fEda0801M    | <i>Ecclisopteryx dalecarlica</i> | Norway, Hedmark, E 9.96412, N, Hedmark (HEN), Follidal, Streitlie; leg. Andersen;                                                  | 62,095  | 9,964   | 658[0n]  | 541[0n]  | 362[0n] | 841[7n]  | 346[0n] | 1038[0n]  | University of Natural Resources and Life Sciences |
| SPDRU004-14 | fEda0802F    | <i>Ecclisopteryx dalecarlica</i> | Norway, Hedmark, E 9.96412, N, Hedmark (HEN), Follidal, Streitlie; leg. Andersen;                                                  | 62,095  | 9,964   | 658[0n]  | 541[0n]  | 362[0n] | 842[6n]  | 346[0n] | 1038[0n]  | University of Natural Resources and Life Sciences |
| SPDRU496-14 | fMelaus0101M | <i>Melampophylax austriacus</i>  | Austria, spring Schwarze Sulm; leg. Graf; 20-Oct-2013                                                                              | 46,8106 | 14,9931 | 658[0n]  | 541[0n]  | 361[0n] | 842[6n]  | n.a.    | 1038[0n]  | University of Natural Resources and Life Sciences |
| SPDRU497-14 | fMelaus0102F | <i>Melampophylax austriacus</i>  | Austria, spring Schwarze Sulm; leg. Graf; 20-Oct-2013                                                                              | 46,8106 | 14,9931 | 658[0n]  | n.a.     | 361[0n] | 843[5n]  | n.a.    | 1038[0n]  | University of Natural Resources and Life Sciences |
